# Supplementary material
Source: publisher figshare collection journal article supplement (https://frontiersin.figshare.com/ndownloader/files/36267288)
Supplement: Supplementary file 1 [file 36267288]

## Supplemental Material

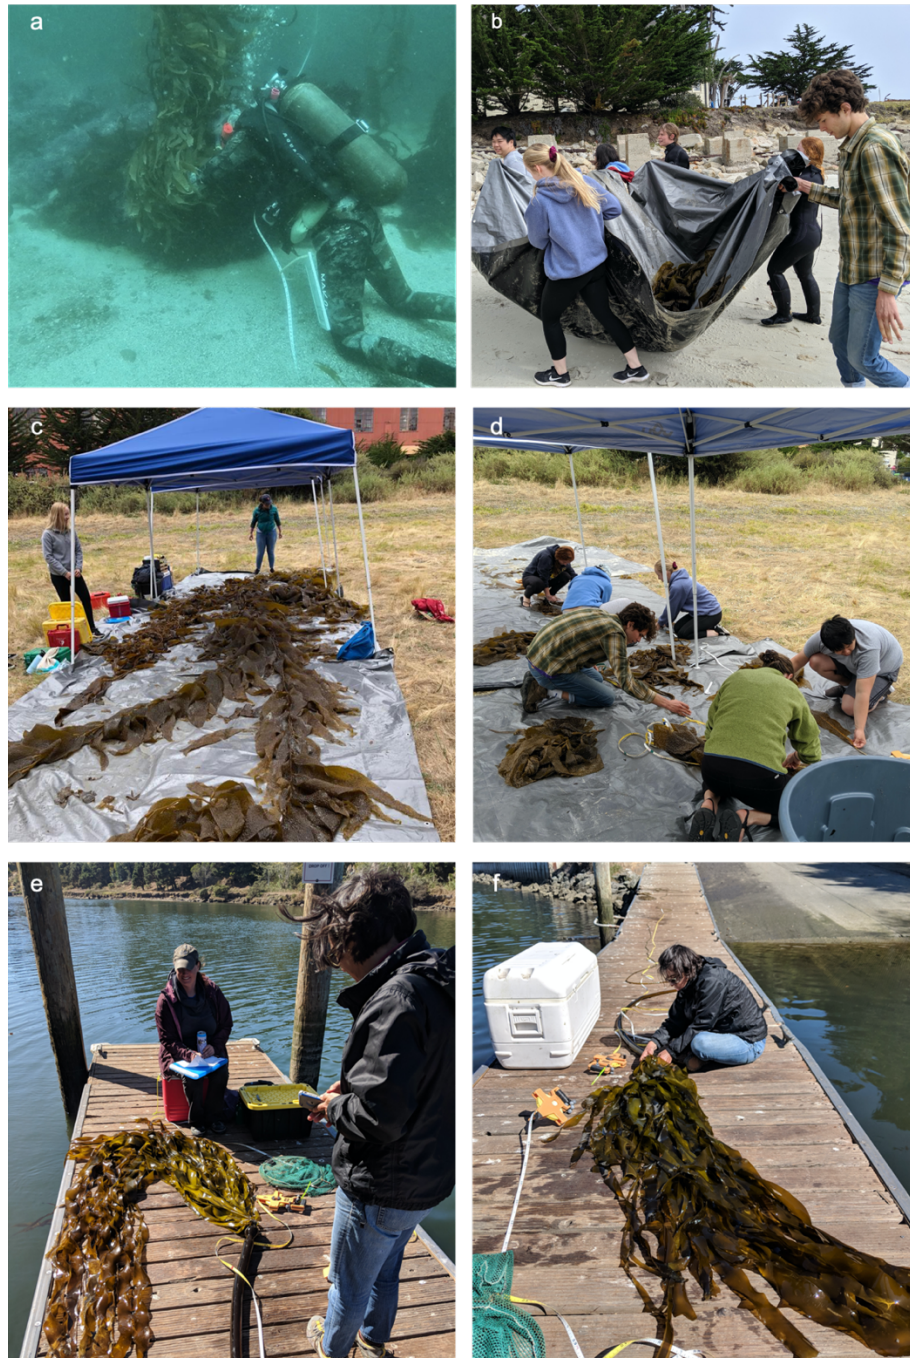

Supplemental Figure 1. Images of morphometric measurements for *Macrocyctis* and *Nereocystis*. a) Diver removing whole *Macrocyctis* sporophyte in situ at the holdfast (Hopkins Marine Life Refuge). b) *Macrocyctis* sporophyte transport from water to a clean and dry location on land. c) Entire *Macrocyctis* sporophyte spread across tarp before dividing into 2 m sections. d) Field technicians measuring morphology of each 2 m section of a *Macrocyctis* sporophyte. E) *Nereocystis* canopy spread out on clean dock ready to be measured. F) Josie Iselin taking counting *Nereocystis* blades for morphometric measurement. Photo credit: a) Sara Hamilton (OSU), b-f): Meredith McPherson.

Supplemental Table 1. Spectral characteristics (center wavelengths and full-width at half-max (FWHM) values in nanometer) for each relevant satellite band (blue, green, red, red-edge, and NIR). Within each cell the top value is the band's center wavelength and the bottom value is the band's FWHM. n/a denotes where band information doesn't exist or isn't available.

| <b>Band</b> | <b>MicaSense<br/>RedEdge-M</b> | <b>PlanetScope</b> | <b>Planet<br/>RapidEye</b> | <b>ESA<br/>Sentinel-2</b> | <b>USGS<br/>Landsat OLI</b> |
|-------------|--------------------------------|--------------------|----------------------------|---------------------------|-----------------------------|
| Blue        | 475                            | 485                | 475                        | 492                       | 480                         |
|             | 32                             | n/a                | n/a                        | 66                        | 60                          |
| Green       | 560                            | 545                | 555                        | 560                       | 561                         |
|             | 27                             | n/a                | n/a                        | 36                        | 57                          |
| Red         | 668                            | 630                | 660                        | 665                       | 655                         |
|             | 14                             | n/a                | n/a                        | 31                        | 38                          |
| Red-Edge    | 717                            |                    | 710                        |                           |                             |
|             | 12                             | n/a                | n/a                        | n/a                       | n/a                         |
| NIR         | 842                            | 820                | 805                        | 833                       | 865                         |
|             | 57                             | n/a                | n/a                        | 106                       | 28                          |
